# Supplementary material for: Appetite regulation genes are associated with body mass index in black South African adolescents: a genetic association study
Source: PubMed Central journal article supplement — BMJ Open. 2012 May 21;2(3):e000873. doi: 10.1136/bmjopen-2012-000873 (PMC3358621; doi:10.1136/bmjopen-2012-000873), 2012-05-21
Supplement: bmjopen-2012-000873-s4.pdf [file bmjopen-2012-000873-s4.pdf]

## Supplementary Figure Legend:

**Supplementary Figure 1:** STRUCTURE analysis with 18 AIMs illustrating no significant population substructure in the Bt20 cohort. The values of K indicate the number of hypothetical ancestral populations. The clustering at K = 2 distinctly separated the African ((1) South African and (2) YRI) from the Non-African ((3) CHB and (4) CEU) populations. Higher order clustering (K=3 to K=4) was found to resolve the Bt20 cohort from all other populations, indicating that these 18 SNPs have the power to detect major differences in population structure. Population designations: (1) South African cohort; (2) HapMap YRI; (3) HapMap CHB; (4) HapMap CEU.

**Supplementary Figure 2:** LD across *LEP* in a South African black population. The top section of the figure illustrates the gene and represents the location of the SNPs in *LEP* that were genotyped in this study. The lower section of the figure shows the output of Haploview – each square (with D' values depicted within the box) represents a pair-wise LD relationship between two SNPs.

## Supplementary Tables:

**Supplementary table 1:** Summary of SNP information genotyped in candidate genes

| Gene       | SNP        | Genomic location * | Chrom | RefSNP Alleles ** | Ancestral allele ** | BMI assoc SNP | TagSNP | AIM |
|------------|------------|--------------------|-------|-------------------|---------------------|---------------|--------|-----|
| <i>FTO</i> | rs9939973  | 53800568           | 16    | A/G               | G                   | x             |        |     |
|            | rs9940128  | 53800754           |       | A/G               | G                   | x             |        |     |
|            | rs1421085  | 53800954           |       | C/T               | T                   | x             |        |     |
|            | rs1121980  | 53809247           |       | C/T               | T                   | x             |        |     |
|            | rs17817449 | 53813367           |       | G/T               | G                   | x             |        |     |
|            | rs8050136  | 53816275           |       | A/C               | A                   | x             |        |     |
|            | rs9939609  | 53820527           |       | A/T               | A                   | x             |        |     |
|            | <i>LEP</i> | rs1349419          |       | 127877213         | 7                   | A/G           | A      | x   |
| rs12535708 |            | 127878098          | A/C   | C                 |                     | x             |        |     |
| rs11770725 |            | 127878267          | C/T   | T                 |                     | x             |        |     |
| rs12535747 |            | 127878335          | A/C   | C                 |                     | x             |        |     |
| rs2167270  |            | 127881349          | A/G   | G                 |                     |               | x      |     |
| rs2278815  |            | 127881851          | A/G   | G                 |                     |               | x      |     |
| rs2122627  |            | 127883323          | C/T   | C                 |                     |               | x      |     |
| rs4236625  |            | 127883695          | A/T   | T                 |                     |               | x      |     |
| rs12706832 |            | 127887139          | A/G   | A                 |                     |               | x      |     |
| rs10244329 |            | 127888689          | A/T   | T                 |                     |               | x      |     |
| rs7791621  |            | 127889696          | A/C   | A                 |                     |               | x      |     |
| rs7795794  |            | 127890151          | A/G   | C                 |                     |               | x      |     |
| rs10954173 |            | 127891440          | A/G   | G                 |                     |               | x      |     |
| rs3828942  |            | 127894305          | A/G   | G                 |                     |               | x      |     |
| rs17151919 |            | 127894592          | A/G   | G                 |                     |               | x      |     |
| rs17151922 |            | 127895216          | G/T   | G                 |                     |               | x      |     |
| rs6966536  |            | 127896059          | A/G   | A                 |                     |               | x      |     |
| rs10954174 |            | 127896536          | A/G   | G                 |                     |               | x      |     |

|                                     |            |           |    |     |   |   |   |   |
|-------------------------------------|------------|-----------|----|-----|---|---|---|---|
|                                     | rs11761556 | 127897069 |    | A/C | A |   | x |   |
| <i>LEPR</i>                         | rs1137100  | 66036441  | 1  | A/G | A | x |   |   |
|                                     | rs1137101  | 66058513  |    | A/G | A | x |   |   |
| <i>MC4R</i>                         | rs17782313 | 57851097  | 18 | C/T | T | x |   |   |
|                                     | rs12970134 | 57884750  |    | A/G | G | x |   |   |
| <i>NPY2R</i>                        | rs2880416  | 156124543 | 4  | C/G | C |   | x |   |
|                                     | rs2342676  | 156124704 |    | A/G | A | x |   |   |
|                                     | rs12649641 | 156125333 |    | A/C | A |   | x |   |
|                                     | rs11099992 | 156125510 |    | A/G | A |   | x |   |
|                                     | rs33977152 | 156128589 |    | A/G | G |   | x |   |
|                                     | rs12507396 | 156129044 |    | A/T | A |   | x |   |
|                                     | rs6857530  | 156129154 |    | A/G | A |   | x |   |
|                                     | rs10461238 | 156132216 |    | C/G | G | x |   |   |
|                                     | rs2342674  | 156135250 |    | A/G | G |   | x |   |
|                                     | rs1047214  | 156135676 |    | C/T | T | x |   |   |
|                                     | rs2880415  | 156136027 |    | A/G | A |   | x |   |
| <i>POMC</i>                         | rs6713532  | 25384833  | 2  | C/T | C |   | x |   |
|                                     | rs7565427  | 25385638  |    | A/G | G |   | x |   |
|                                     | rs7565877  | 25386064  |    | A/G | A |   | x |   |
| <i>Ancestry informative markers</i> | rs723854   | 192511012 | 1  | C/G | G |   |   | x |
|                                     | rs1876482  | 17362568  | 2  | C/T | C |   |   | x |
|                                     | rs952718   | 215888624 | 2  | A/C | A |   |   | x |
|                                     | rs1344870  | 21307401  | 3  | A/C | A |   |   | x |
|                                     | rs720096   | 179551071 | 4  | C/G | C |   |   | x |
|                                     | rs1363448  | 140783596 | 5  | C/T | T |   |   | x |
|                                     | rs217538   | 108483470 | 6  | C/G | C |   |   | x |
|                                     | rs65264    | 28545611  | 7  | C/T | T |   |   | x |
|                                     | rs679047   | 12883664  | 9  | A/T | T |   |   | x |
|                                     | rs2077559  | 36014850  | 9  | C/T | T |   |   | x |
|                                     | rs714857   | 15974389  | 11 | C/T | T |   |   | x |
|                                     | rs953386   | 110943692 | 13 | A/G | A |   |   | x |
|                                     | rs722869   | 97277005  | 14 | C/G | C |   |   | x |

|           |          |    |     |   |  |   |
|-----------|----------|----|-----|---|--|---|
| rs735612  | 34076642 | 15 | G/T | G |  | x |
| rs2089740 | 36310531 | 15 | G/T | G |  | x |
| rs1823718 | 74147244 | 15 | C/T | T |  | x |
| rs1858465 | 51142920 | 17 | A/T | A |  | x |
| rs2112527 | 9603751  | 19 | A/G | G |  | x |

\* Chromosomal location of SNPs obtained from NCBI genome build 37.1 (hg19).

\*\* RefSNP allele and ancestral alleles according to NCBI dbSNP Build 134.

**Supplementary table 2:** Allele- and genotype frequencies of AIMs in the South African cohort

| SNP       | n   | RefSNP alleles* |   | Frequency |      |      |        |      |
|-----------|-----|-----------------|---|-----------|------|------|--------|------|
|           |     |                 |   | Genotype  |      |      | Allele |      |
|           |     | A               | B | AA        | AB   | BB   | A      | B    |
| rs723854  | 974 | C               | G | 0.05      | 0.31 | 0.65 | 0.20   | 0.80 |
| rs1876482 | 983 | T               | C | 0.00      | 0.00 | 1.00 | 0.00   | 1.00 |
| rs952718  | 973 | A               | C | 0.49      | 0.42 | 0.09 | 0.70   | 0.30 |
| rs1344870 | 977 | A               | C | 0.90      | 0.10 | 0.00 | 0.95   | 0.05 |
| rs720096  | 970 | C               | G | 0.64      | 0.32 | 0.05 | 0.79   | 0.21 |
| rs1363448 | 981 | T               | C | 1.00      | 0.00 | 0.00 | 1.00   | 0.00 |
| rs217538  | 984 | C               | G | 0.00      | 0.03 | 0.97 | 0.02   | 0.98 |
| rs65264   | 982 | T               | C | 0.64      | 0.33 | 0.03 | 0.80   | 0.20 |
| rs679047  | 978 | A               | T | 0.08      | 0.43 | 0.50 | 0.29   | 0.71 |
| rs2077559 | 972 | T               | C | 0.44      | 0.45 | 0.10 | 0.67   | 0.33 |
| rs953386  | 988 | A               | G | 0.21      | 0.50 | 0.30 | 0.46   | 0.54 |
| rs722869  | 986 | C               | G | 0.79      | 0.20 | 0.01 | 0.89   | 0.11 |
| rs735612  | 979 | T               | G | 0.21      | 0.51 | 0.28 | 0.47   | 0.53 |
| rs2089740 | 970 | T               | G | 0.11      | 0.46 | 0.42 | 0.35   | 0.65 |
| rs1823718 | 972 | T               | C | 0.62      | 0.35 | 0.03 | 0.79   | 0.21 |
| rs1858465 | 972 | A               | T | 0.02      | 0.26 | 0.72 | 0.15   | 0.85 |
| rs2112527 | 984 | A               | G | 0.43      | 0.47 | 0.11 | 0.66   | 0.34 |

\* RefSNP allele and ancestral alleles according to NCBI dbSNP Build 134.

**Supplementary table 3:** Allele frequencies of AIMs in the South African cohort (SAB) and three HapMap populations

| SNP ID    | RefSNP alleles* |   | Allele Frequencies |      |      |      |      |      |      |      |
|-----------|-----------------|---|--------------------|------|------|------|------|------|------|------|
|           |                 |   | YRI                |      | CEU  |      | CHB  |      | SAB  |      |
|           |                 |   | A                  | B    | A    | B    | A    | B    | A    | B    |
| rs723854  | C               | G | 0.19               | 0.81 | 0.62 | 0.38 | 0.62 | 0.38 | 0.20 | 0.80 |
| rs1876482 | T               | C | 0.00               | 1.00 | 0.03 | 0.98 | 0.70 | 0.30 | 0.00 | 1.00 |
| rs952718  | A               | C | 0.74               | 0.26 | 0.11 | 0.89 | 0.04 | 0.96 | 0.70 | 0.30 |
| rs1344870 | A               | C | 0.95               | 0.05 | 0.98 | 0.02 | 0.73 | 0.27 | 0.95 | 0.05 |
| rs720096  | C               | G | 0.04               | 0.96 | 0.53 | 0.48 | 0.01 | 0.99 | 0.79 | 0.21 |
| rs1363448 | T               | C | 0.86               | 0.14 | 0.42 | 0.58 | 0.35 | 0.65 | 1.00 | 0.00 |
| rs217538  | C               | G | 0.97               | 0.03 | 0.68 | 0.32 | 0.41 | 0.59 | 0.02 | 0.98 |
| rs65264   | T               | C | 0.87               | 0.13 | 0.67 | 0.33 | 0.42 | 0.58 | 0.80 | 0.20 |
| rs679047  | A               | T | 0.22               | 0.78 | 0.08 | 0.92 | 0.09 | 0.91 | 0.29 | 0.71 |
| rs2077559 | T               | C | 0.77               | 0.23 | 0.88 | 0.12 | 0.73 | 0.27 | 0.67 | 0.33 |
| rs953386  | A               | G | 0.46               | 0.54 | 0.15 | 0.85 | 0.09 | 0.91 | 0.46 | 0.54 |
| rs722869  | C               | G | 0.93               | 0.07 | 0.88 | 0.12 | 0.14 | 0.86 | 0.89 | 0.11 |
| rs735612  | T               | G | 0.42               | 0.58 | 0.61 | 0.39 | 0.98 | 0.02 | 0.47 | 0.53 |
| rs2089740 | T               | G | 0.29               | 0.71 | 0.06 | 0.94 | 0.32 | 0.69 | 0.35 | 0.65 |
| rs1823718 | T               | C | 0.77               | 0.23 | 0.54 | 0.46 | 0.99 | 0.01 | 0.79 | 0.21 |
| rs1858465 | A               | T | 0.90               | 0.10 | 0.18 | 0.82 | 0.34 | 0.66 | 0.15 | 0.85 |
| rs2112527 | A               | G | 0.55               | 0.45 | 0.93 | 0.07 | 0.97 | 0.03 | 0.66 | 0.34 |

\* RefSNP allele and ancestral alleles according to NCBI dbSNP Build 134

YRI – HapMap Yoruba from Nigeria; CEU – HapMap Utah residents with European ancestry ; CHB – HapMap Han Chinese population; SAB – South African black population (Bt20).
