# Supplementary figures and images for: Appetite regulation genes are associated with body mass index in black South African adolescents: a genetic association study
Source: PubMed Central journal article supplement — BMJ Open. 2012 May 21;2(3):e000873. doi: 10.1136/bmjopen-2012-000873 (PMC3358621; doi:10.1136/bmjopen-2012-000873), 2012-05-21

**K=2**

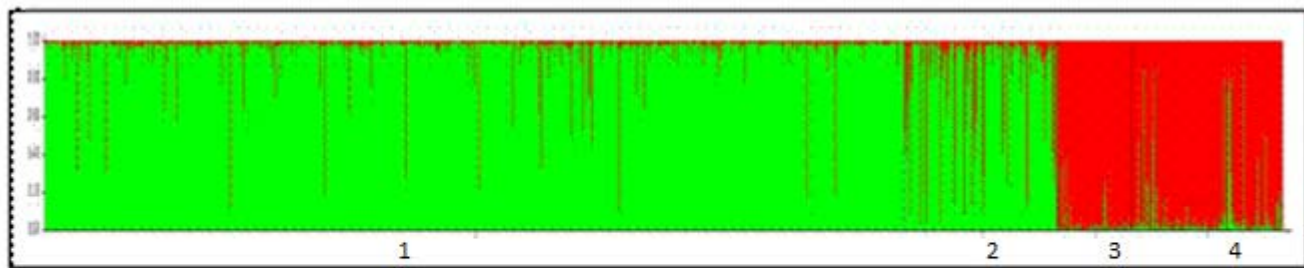

**K=3**

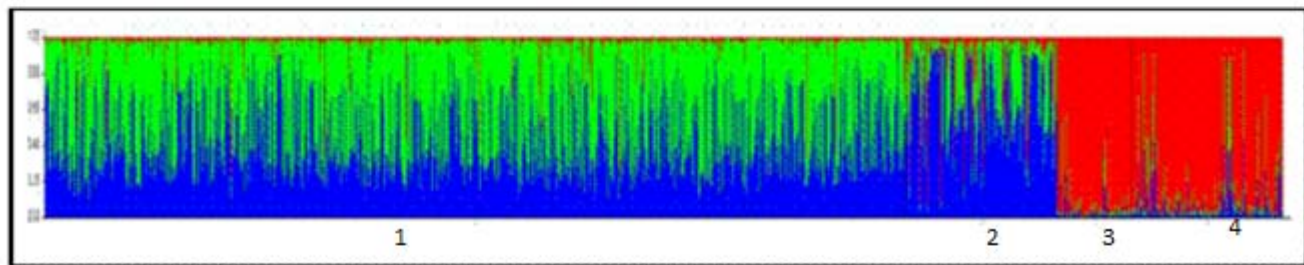

**K=4**

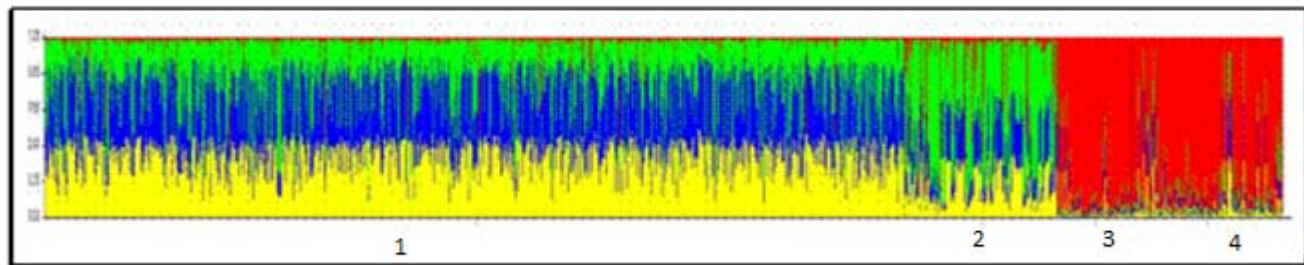

Supplement: bmjopen-2012-000873-s1.pdf [file bmjopen-2012-000873-s1.pdf]
