# Supplementary figures and images for: Appetite regulation genes are associated with body mass index in black South African adolescents: a genetic association study
Source: HighWire-hosted journal article supplement (doi:10.1136/bmjopen-2012-000873), 2012-01-01

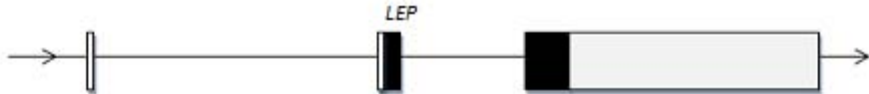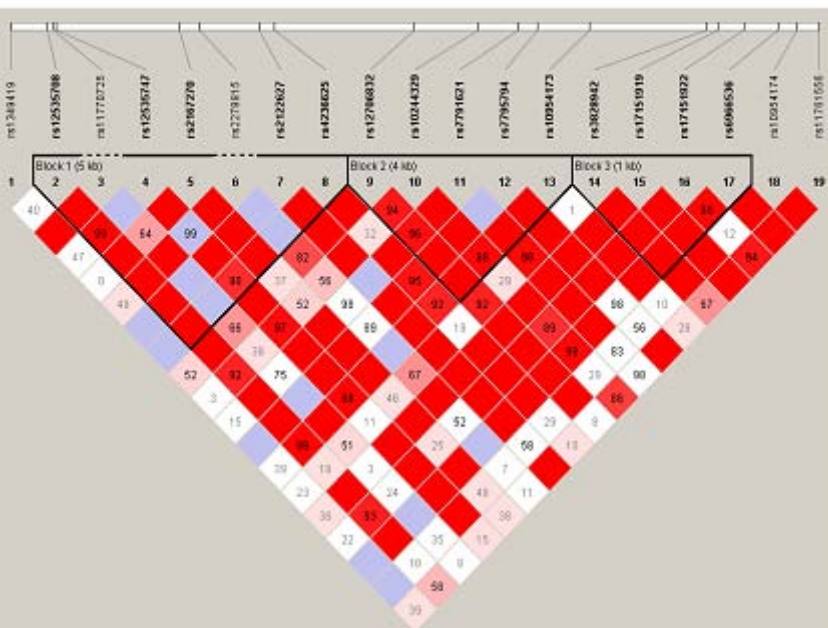

Supplement: bmjopen-2012-000873-s2.pdf [file bmjopen-2012-000873-s2.pdf]
